# Supplementary material for: Comparison of fracture resistance between immediate and delayed composite restorations with or without fiber after root canal treatment: a field-emission-gun scanning electron microscope study
Source: PeerJ. 2025 Feb 25;13:e19018. doi: 10.7717/peerj.19018 (PMC11869885; doi:10.7717/peerj.19018)
Supplement: Supplemental Information 1 [file peerj-13-19018-s001.xlsx]

## Sheet: Sayfa1
		Fracture resistance values of immediate restorations after RCT
Sample number	Group I(Nanohybrid composite resin)	Group II(Flowable bulk-fill composite resin)	Group III(Polyethylene fiber+flowable bulk-fill composite)
1	734.804	734.804	734.804
2	822.786	622.372	1105.99
3	1366.09	1145.07	1034.93
4	773.068	679.843	1094.17
5	1039.3	402.204	1162.72
6	843.868	1343.93	806.507
7	883.52	623.82	1308.82
8	740.47	841.796	494.955
9	968.994	1028.54	959.85
10	1251.18	1297.89	978.01
MED	942.408	884.293	1002.81
		Fracture resistance values after delayed 3 months with thermo-mechanical aging
Sample number	Group IV(Nanohybrid composite resin)	Group V(Flowable bulk-fill composite resin)	Group VI(Polyethylene fiber+flowable bulk-fill composite)
1	540.403	415.237	682.972
2	567.044	441.594	556.188
3	614.553	1357.27	576.073
4	689.534	1258.28	838.7
5	922.407	1127.38	971.347
6	634.99	552.473	728.631
7	1265.18	1158.57	577.303
8	1082.32	1169.78	899.713
9	575.732	1356.49	1350.78
10	1251.73	800.102	752.05
MED	814.424	963.718	793.376
